# Supplementary material for: Right ventricular remodelling in pulmonary arterial hypertension predicts treatment response
Source: PubMed Central journal article supplement (PMC9380507; doi:10.1136/heartjnl-2021-320733), 2022-05-05
Supplement: heartjnl-2021-320733supp001.pdf [file heartjnl-2021-320733supp001.pdf]

## Supplementary Material

### **Baseline Assessment:**

#### **Correlations**

Pearson's correlation test was used to identify CMR derived RV mass and volume variables that had a significant correlation with mPAP, PVR, mixed venous oxygen saturation (SvO<sub>2</sub>), RVEF<sub>%pred</sub> and RA area (**Supplementary Table 2**).

Significant correlations were observed between mPAP with all RV mass and volume variables, VMI had the strongest correlation ( $r=0.525$ ,  $p<0.001$ ). PVR was significantly correlated with RVEF<sub>%pred</sub> ( $r=-0.467$ ,  $p<0.001$ ), RVEDVI<sub>%pred</sub>/VMI ( $r=-0.400$ ,  $p<0.001$ ), RVESVI<sub>%pred</sub>/VMI ( $r=-0.197$ ,  $p<0.001$ ) and VMI ( $r=0.465$ ,  $p<0.001$ ). Variables that correlated with SvO<sub>2</sub> included RVEDVI<sub>%pred</sub> ( $r=-0.212$ ,  $p<0.001$ ), RVESVI<sub>%pred</sub> ( $r=-0.325$ ,  $p<0.001$ ), RVEF<sub>%pred</sub> ( $r=0.404$ ,  $p<0.001$ ), RVEDVI<sub>%pred</sub>/VMI ( $r=0.189$ ,  $p<0.001$ ), VMI ( $r=-0.257$ ,  $p<0.001$ ) and RA area ( $r=-0.300$ ,  $p<0.001$ ).

#### **Survival analyses**

Cox regression model with an enter approach involves using all the selected variables in the derivation of the model.

### **Follow-up Assessment:**

#### **Transition of RV volume and mass parameters: Independent t-test**

Independent unpaired t-test was used to compare the values of RVESVI<sub>%pred</sub> and VMI in the alive and dead cohorts.

Among patients who survived, significant reduction was observed in mean RVESVI<sub>%pred</sub> (from  $212.6\pm122.0$  to  $170.0\pm81.3$ ;  $p=0.012$ ) and VMI (from  $0.58\pm0.34$  to  $0.46\pm0.23$ ;  $p=0.012$ ). In contrast, there was no significant change in mean RVESVI<sub>%pred</sub> or VMI for patients who died.

## **Survival Analyses**

Cox regression model with a forward approach starts with an empty model and adds in variables one by one, while prioritising variable that gives the single best improvement.

**Supplementary Table 1:** Treatment regimen in incident and prevalent patients

| Treatment Regimen   | Incident<br>(N=362) | Prevalent<br>(N=142) |
|---------------------|---------------------|----------------------|
| Monotherapy         | 121 (33.4%)         | 22 (15.5)            |
| Combination therapy | 183 (50.6%)         | 82 (57.7%)           |
| Iloprost            | 53 (14.6%)          | 38 (26.8)            |
| Not on treatment    | 5 (1.4%)            | 0 (0.0%)             |

**Supplementary Table 2: Pearson Correlations of the variables**

| Variable                     | mPAP    |         | PVR     |         | SvO <sub>2</sub> |         |
|------------------------------|---------|---------|---------|---------|------------------|---------|
|                              | r Value | p-value | r Value | p-value | r Value          | p-value |
| RVEDVI <sub>%pred</sub>      | 0.261   | <0.001  | 0.186   | <0.001  | -0.212           | <0.001  |
| RVESVI <sub>%pred</sub>      | 0.319   | <0.001  | 0.326   | <0.001  | -0.325           | <0.001  |
| RVEF <sub>%pred</sub>        | -0.393  | <0.001  | -0.467  | <0.001  | 0.404            | <0.001  |
| RVEDVI <sub>%pred</sub> /VMI | -0.413  | <0.001  | -0.400  | <0.001  | 0.189            | <0.001  |
| RVESVI <sub>%pred</sub> /VMI | -0.248  | <0.001  | -0.197  | <0.001  | 0.001            | 0.984   |
| VMI                          | 0.525   | <0.001  | 0.465   | <0.001  | -0.257           | <0.001  |
| RA Area                      | 0.262   | <0.001  | 0.197   | <0.001  | -0.300           | <0.001  |

**Supplementary Table 3:** Bivariate Model of RVESVI<sub>%pred</sub> and VMI

|                         | B      | SE    | Wald   | df | p-value | Hazard Ratio | 95% CI Lower Limit | 95% CI Upper Limit |
|-------------------------|--------|-------|--------|----|---------|--------------|--------------------|--------------------|
| RVESVI <sub>%pred</sub> | 0.002  | 0.001 | 12.834 | 1  | <0.001  | 1.002        | 1.001              | 1.003              |
| VMI                     | -0.965 | 0.270 | 11.939 | 1  | 0.001   | 0.381        | 0.220              | 0.659              |

**Supplementary Table 4:** Demographics and comparison of different volume/mass groups at follow-up

|                                 | All Groups<br>(N=124) | LVLM<br>(N=62)       | LVHM<br>(N=15)       | HVLM<br>(N=23)          | HVHM<br>(N=24)          |
|---------------------------------|-----------------------|----------------------|----------------------|-------------------------|-------------------------|
| <b>Demographics</b>             |                       |                      |                      |                         |                         |
| Age (years)                     | 53 (16)               | 53 <sup>f</sup> (15) | 42 <sup>§</sup> (11) | 67 <sup>†§¶</sup> (12)  | 48 <sup>¶</sup> (16)    |
| Sex M/F (n, male %)             | 35/89 (28%)           | 19/43 (31%)          | 4/11 (27%)           | 7/16 (30%)              | 5/19 (21%)              |
| <b>PAH subtype (n, %)</b>       |                       |                      |                      |                         |                         |
| IPAH                            | 64 (51.6%)            | 33 (53.2%)           | 9 (60.0%)            | 6 <sup>¶</sup> (26.1%)  | 16 <sup>¶</sup> (66.7%) |
| PAH-CTD                         | 48 (38.7%)            | 22 (35.5%)           | 5 (33.3%)            | 15 <sup>¶</sup> (65.2%) | 6 <sup>¶</sup> (25.0%)  |
| Other Subtypes                  | 12 (9.7%)             | 7 (11.3%)            | 1 (6.7%)             | 2 (8.7%)                | 2 (8.3%)                |
| <b>Treatment regimen (n, %)</b> |                       |                      |                      |                         |                         |
| Monotherapy                     | 23 (19.2%)            | 15 (25.9%)           | 3 (20.0%)            | 3 (13.0%)               | 2 (8.3%)                |
| Combination                     | 59 (49.2%)            | 31 (53.4%)           | 6 (40.0%)            | 11 (47.8%)              | 11 (45.8%)              |
| Iloprost                        | 38 (31.7%)            | 12 (20.7%)           | 6 (40.0%)            | 9 (39.1%)               | 11 (45.8%)              |

Treatment data is not available for 4 patients.

**Supplementary Table 5:** Multivariable Model of Volume/Mass group at follow-up and Age

|                  | B     | SE    | Wald   | df | p-value | Hazard Ratio | 95% CI Lower Limit | 95% CI Upper Limit |
|------------------|-------|-------|--------|----|---------|--------------|--------------------|--------------------|
| Age at Follow-up | 0.042 | 0.012 | 12.452 | 1  | <0.001  | 1.042        | 1.019              | 1.067              |
| LVLM             |       |       | 16.367 | 3  | 0.001   |              |                    |                    |
| LVHM             | 1.460 | 0.495 | 8.689  | 1  | 0.003   | 4.305        | 1.631              | 11.362             |
| HVLM             | 1.193 | 0.397 | 9.046  | 1  | 0.003   | 3.298        | 1.515              | 7.176              |
| HVHM             | 1.377 | 0.407 | 11.464 | 1  | 0.001   | 3.965        | 1.786              | 8.800              |
